# Supplementary material for: Incorrect Likelihood Methods Were Used to Infer Scaling Laws of Marine Predator Search Behaviour
Source: PLoS One. 2012 Oct 5;7(10):e45174. doi: 10.1371/journal.pone.0045174 (PMC3465316; doi:10.1371/journal.pone.0045174)
Supplement: Code S4 — R code for standard calculations of likelihood and Akaike weights for mussels data. (R) [file pone.0045174.s004.r]

# codeDmussels.r - calculations for mussels data set. 13th July 2012
# Andrew Edwards, Andrew.Edwards@dfo-mpo.gc.ca
# 
# Provided in the spirit of Barnes, N. (2010), Publish your computer
#  code - it is good enough, Nature 467:753.
#  
# Adapting from codeAbigeye1.r to apply to mussels data (easier than
#  adapting mussels Sweave files).
# Using the corrected data set received from Monique de Jager
#  on 24th February 2012.
#
# codeAbigeye1.r - Standard Likelihood and Akaike weight calculations
#  for analysis of bigeye tuna data. In the
#  comments and printed out to the console are direct chunks
#  of text from our manusript, follwed by the printout of the
#  corresponding calculation from the code. So to check a
#  calculation reported in the code, find the corresponding
#  text in this file. To do analyses on other data sets, adapt
#  this code down to the start of Issue One.
#  Andrew Edwards, Andrew.Edwards@dfo-mpo.gc.ca . 
#  25th June 2012.

# To see the code echoed in your console, run
#  source("codeDmussels.r", echo=TRUE)

# R code extracted from Sweave file bigeyemle.Snw that was started 
#  on 13th October 2009.

rm(list=ls())    

### R function definitions ###

# Negative log-likelihood function for power law distribution over
#  infinite range (PL model). From equation (5) in Edwards et al.
#  (2007), Nature 449:1044-1048. Note here using the negative
#  log-likelihood to be minimised. [The 'raw' in the function name
#  corresponds to using the raw data - earlier studies have required
#  explicit likelihood functions that took into account the data
#  collection methods (e.g. albatross data in 2007 paper), or
#  analysing data that were already binned and not available 'raw'
#  (e.g. bees data in 2007 paper)].

negloglpowlawrawinf = function(mu)
  {     
  if(mu <= 1)
    {stop("WARNING: Cannot have mu less than or equal to 1 for pow law over inf range")}    # So change starting value
  else                 # Negative log-likelihood is just:     
    { -n * log(mu - 1) - n *(mu - 1) * log(a) + mu * sumlogx}
  }

# Negative log-likelihood function for exponential distribution
#  over infinite range (Exp model). From equation (6) in Edwards
#  et al. (2007). 
negloglexprawinf = function(lambda)   
  {    # Negative log-likelihood is just:                         
     - n * log(lambda) - n * lambda * a + lambda * sumx
  }

# Negative log-likelihood function for bounded power law
#  distribution (PLB model). From equation (A.23) in Edwards (2011),
#  Ecology 92:1247-1257.
negloglpowlawrawballmu = function(mu)
  {              #  Negative log-likelihood is:
  if(mu == 1)    # See equation (A.25) in Ecology paper.
    { n * log( log( b/a)) + sumlogx}
  else
    { -n * log( (mu - 1) / (a^(1 - mu) - b^(1 - mu))) + mu * sumlogx}
                 # This works for mu<1 as well as mu>1
  }

# Negative log-likelihood function for bounded exponential
#  distribution (ExpB model). From equation (A.27) in
#  Edwards (2011).
negloglexprawb = function(lambda)
  {               # Negative log-likelihood is just:  
     - n * log(abs(lambda)) + n * log( abs( exp(- lambda * a) - exp( -lambda * b) ) ) + lambda * sumx    # abs allows lambda < 0
  }

# For printing output to screen (I normally use Sweave and it
#  would go straight into a LaTeX file, but am sticking with R
#  for simplicity to make this code available):
catPaste = function(x)
  cat(paste(as.character(substitute(x)), "=", x), "\n") 

### End R function definitions ###


### R parameter definitions ###

a = 0.2                          # Minimum of range of data over
                                 #  which to test model. Either
                                 #  predefine a here or use NA to
                                 #  test the full data set. Using
                                 #  using minimum value of 0.2 as
                                 #  done by de Jager et al.

if( is.na(a) ) {numparinf = 2} else
  {numparinf = 1}                # if a is min of data then
                                 #  estimating a and mu/lambda for
                                 #  unbounded models; numparinf is
                                 #  number of parameters estimated
                                 #  for unbounded (inf) models.
                                 # Else if prescribing a then just
                                 #  mu is estimated.
numpar = numparinf + 1           # num of pars for bounded models

bround = FALSE                   # Whether to round b up. If TRUE 
                                 #  then b=ceiling(max(rawvalsall))
                                 #  FALSE b= max(rawvalsall) [below].


# These are for numerical optimizations.

monthind = 1          # this was a monthly index for some previously
                      #  analysed data for which some of the code
                      #  was vectorised and loopable. Keep it in
                      #  but it's just set to 1 for bigeye analysis.

                      # Similarly, these are vectors for generality.
                      #  They are the starting value for optimisation
                      #  and the start, end, and increments to use
                      #  to generate values to calculate 95%
                      #  confidence intervals.
mu.startinfvec = vector()        # inf corresponds to unbounded 
lambda.startinfvec = vector()    #  (infinite) models.
muvecinfstartvec = vector()
muvecinfendvec   = vector()
muvecinfincvec   = vector()
muvecstartvec    = vector()
muvecendvec      = vector()
muvecincvec      = vector()
lambdaincvec     = vector()
mu.start2vec     = vector()
lambda.start2vec = vector()
xrankfreqinfmaxvec = vector()

# Initial starting values for finding MLE using nlm. I usually set
#  to close to what it eventually finds to avoid NA/Inf warnings,
#  which can occur when initial gradient is too steep, but haven't
#  done that for this data set (so there'll be some warnings).

mu.startinfvec[1] = c(1.40)
lambda.startinfvec[1] = c(0.05)
mu.start2vec[1] = c(1.5)      
lambda.start2vec[1] = c(0.0556) 

# To define range of mu to try for inf, must be >1
muvecinfstartvec[1] = c(1.6)
muvecinfendvec[1] = c(1.8)
muvecinfincvec[1] = c(0.0001)

# for mu bounded.
muvecstartvec[1]  = c(0.9)
muvecendvec[1]  = c(1.7)
muvecincvec[1]  = c(0.001)

# increment for lambda (0.5 and 2* mle)
lambdaincvec[1] = c(10^(-5))

xrankfreqinfmaxvec[1] = c(500)  # must go to edge of rankfreq plot

# solitaryMusselsSteplengths.txt is the data file received
#  from Monique de Jager, 24th February 2012. This is the corrected
#  data file as published in their Erratum.

# The file contains a single column of step lengths, in mm.
# There were 12,694 step lengths, ranging from 0.007 mm to 119 mm.
# In the Erratum figure, models were fitted down to a length
#  of 0.2 mm, so that is what we do here (i.e. set a = 0.2).

# pseudoMussels.txt is the pseudo data file (that was obtained by
#  sampling from the original step sizes, >0.2 mm only,
#  with replacement to obtain a pseudo data set of the same size
#  with similar properties, that can be made publicly available).

original.data = 0           # switch: 1 for original, 0 for pseudo

if(original.data)
  { mussels = read.table("solitaryMusselsSteplengths.txt",
      header = FALSE) } else
  { mussels = read.table(file="pseudoMussels.txt", header=FALSE)}


if(original.data)
  {  print("Using original data") } else
  {  print("**Note: using pseudo data so numbers will not exactly match published results**")}

dim(mussels)                # should be  12694 1

rawvalsall = mussels[,1]    # just the column of values

rawvalsall = rawvalsall[!is.na(rawvalsall)]
                            # include < a, remove NA's  
rawvalsall = rawvalsall[rawvalsall > 0] # and remove zeros  
                            # Doesn't affect mussels values

if(bround) { b = ceiling(max(rawvalsall)) } else
  { b = max(rawvalsall) }

if( is.na(a) ) a = min(rawvalsall)
                            # else it's the value prescribed above

x = rawvalsall[rawvalsall >= a]   
n = length(x) 
if(n != 6996) stop("***Error here***")
                            # check sample size is correct


# Re-analysis using standard likelihood methods and Akaike weights

# Likelihood calculations.
#  Range of mu to try for PL model, can't be <=1
muvecinf = seq(muvecinfstartvec[monthind], muvecinfendvec[monthind], muvecinfincvec[monthind])                    

#  Range of mu to try for PLB model, can't be <=1
muvec = seq(muvecstartvec[monthind], muvecendvec[monthind], muvecincvec[monthind])

sumx = sum(x)            # for negloglexprawb function
sumlogx = sum( log( x) ) # for negloglpowlawrawb function

# Need to use AIC or AICc consistently across all models, 
#  so decide here.

if(n/numparinf < 40 | n/numpar < 40) 
  # Then use AICc - p66 Burnham and Anderson (2002).
  { use.AICc = TRUE } else   
    { use.AICc = FALSE}               # Or stick with AIC
 
# PL model:

# Analytically (Box 1 of Edwards et al. 2007):
mumleinfanal = 1/( - log(a) + sumlogx/n) + 1
                         # maximum likelihood estimate for mu

# Numerically:
outpowlawinf = nlm(negloglpowlawrawinf, mu.startinfvec[monthind])  
                         # , print.level=2)
mumleinf = outpowlawinf$estimate
negloglikmlepowlawinf = outpowlawinf$minimum
                         # negative log likelihood

# Check that analytical and numerical agree:
if( abs(mumleinf - mumleinfanal) >10^(-5))
  {stop("Analytical and numerical disagree for PL model")}

# Normalisation constant:
Cpowlawinf = (mumleinf - 1) * a^(mumleinf - 1)

AICpowlawinf = 2 * negloglikmlepowlawinf + 2*numparinf 
                           # will be +4 if est mu and a

if(use.AICc)               # Small sample-size correction.
 { AICpowlawinf = AICpowlawinf + 2*numparinf*(numparinf+1)/( n - numparinf - 1)  
   print(paste("Using AICc for PL model, index ", monthind))
 }

#   From B&A p286:
BICpowlawinf = 2 * negloglikmlepowlawinf + numparinf * log(n) 

# Now for 95% CI of MLE:
muvarynegloglikinf = vector()  # negative log lik for each mu value
  for(i in 1:length(muvecinf))
    {
      muvarynegloglikinf[i] = negloglpowlawrawinf(muvecinf[i])
    }
critval1inf = negloglikmlepowlawinf + qchisq(0.95,1)/2  
                  # 1 dof. Hilborn and Mangel (1997) p163.
muin95inf = muvecinf[ muvarynegloglikinf < critval1inf] 
                  # mu values definitely in 95% confidence interval
minmuin95inf = min(muin95inf)
maxmuin95inf = max(muin95inf)
if(minmuin95inf == min(muvecinf) | maxmuin95inf == max(muvecinf))
  { windows()
    plot(muvecinf, muvarynegloglikinf)
    abline(h = critval1inf, col="red")
    stop("WARNING: Need to make muvecinf larger, (but can't make min value <=1) - see R window")
  }


# Now for Exp model.
# Analytically (Box 1, Edwards et al. 2007):
lambdamleinfanal = 1 / ( sumx/n - a)    # MLE for lambda
outexpinf = nlm(negloglexprawinf, lambda.startinfvec[monthind])
                                        # , print.level=2)
lambdamleinf = outexpinf$estimate
if( abs(lambdamleinf - lambdamleinfanal) >10^(-5))
   {stop("Analytical and numerical disagree for Exp model")}

negloglikmleexpinf = outexpinf$minimum

Cexpinf = lambdamleinf * exp(lambdamleinf * a)
AICexpinf = 2 * negloglikmleexpinf + 2*numparinf   

if(use.AICc)               # Small sample-size correction.
  { AICexpinf = AICexpinf + 2*numparinf*(numparinf+1)/( n - numparinf - 1)
   print(paste("Using AICc for Exp model, index ", monthind))
  }

BICmleexpinf = 2 * negloglikmleexpinf + numparinf * log(n)
                           # B&A p286

# Now for 95% CI of MLE:   
lambdavecinf = seq(round(0.5*lambdamleinf, digits=5), 2*lambdamleinf,lambdaincvec[monthind])

lambdavarynegloglikinf = vector()
                           # negative log lik for each lambda value
  for(i in 1:length(lambdavecinf))
  {
    lambdavarynegloglikinf[i] = negloglexprawinf(lambdavecinf[i])
  }
critval2inf = negloglikmleexpinf + qchisq(0.95,1)/2 
                 # 1 dof. Hilborn and Mangel (1997) p163.
lambdain95inf = lambdavecinf[ lambdavarynegloglikinf < critval2inf]
                 #lambda values definitely in 95% confidence interval

if(min(lambdain95inf) == min(lambdavecinf) | max(lambdain95inf) == max(lambdavecinf))
 { windows()
   plot(lambdavecinf, lambdavarynegloglikinf)
   abline(h = critval2inf, col="red")
   stop("WARNING: Need to make lambdavecinf larger -- see R window")
 }


# Now for PLB model (bounded power law - denoted powlaw here):

outpowlaw = nlm(negloglpowlawrawballmu, mu.start2vec[monthind]) 
                  #, print.level=2)
mumle = outpowlaw$estimate

negloglikmlepowlaw = outpowlaw$minimum

Cpowlaw = (mumle - 1) / (a^(1-mumle) - b^(1-mumle)) 

AICpowlaw = 2 * negloglikmlepowlaw + 2*numpar

if(use.AICc)              # Small sample-size correction.
 { AICpowlaw = AICpowlaw + 2*numpar*(numpar+1)/( n - numpar - 1)  
   print(paste("Using AICc for PLB, index ", monthind))
 }
BICpowlaw = 2 * negloglikmlepowlaw + numpar * log(n)   # B&A p286


# Now for 95% CI of MLE:    
muvarynegloglik = vector()       # negative log lik for each mu value
  for(i in 1:length(muvec))
    {
      muvarynegloglik[i] = negloglpowlawrawballmu(muvec[i])
    }
critval1 = negloglikmlepowlaw + qchisq(0.95,1)/2
                    # 1 dof. Hilborn and Mangel (1997) p163.
muin95 = muvec[ muvarynegloglik < critval1] 
                    # mu values definitely in 95% confidence interval
minmuin95 = min(muin95)
maxmuin95 = max(muin95)
if(minmuin95 == min(muvec) | maxmuin95 == max(muvec))
  { windows()
    plot(muvec, muvarynegloglik)
    abline(h = critval1, col="red")
    stop("WARNING: Need to make muvec larger - see R window")
  }

# Now for ExpB model:
outexp = nlm(negloglexprawb, lambda.start2vec[monthind]) 
                     #, print.level=2) 
lambdamle = outexp$estimate
negloglikmleexp = outexp$minimum

Cexp = lambdamle / (exp(- lambdamle * a) - exp( -lambdamle * b))
AICexp = 2 * negloglikmleexp + 2*numpar    
if(use.AICc)               # Small sample-size correction.
  { AICexp = AICexp + 2*numpar*(numpar+1)/( n - numpar - 1)
    print(paste("Using AICc for ExpB, index ", monthind))
  }

# From B&A p286
BICmleexp = 2 * negloglikmleexp + numpar * log(n)

# Now for 95% CI of MLE:
lambdavec = seq(round(0.5*lambdamle, digits=5), 2*lambdamle, lambdaincvec[monthind])

lambdavarynegloglik = vector()
                           # negative log lik for each lambda value
  for(i in 1:length(lambdavec))
  {
    lambdavarynegloglik[i] = negloglexprawb(lambdavec[i])
  }
critval2 = negloglikmleexp + qchisq(0.95,1)/2
                # 1 dof. Hilborn and Mangel (1997) p163.
lambdain95 = lambdavec[ lambdavarynegloglik < critval2] 
                # lambda values definitely in 95% confidence interval
if(min(lambdain95, na.rm=TRUE) == min(lambdavec, na.rm=TRUE) | max(lambdain95, na.rm=TRUE) == max(lambdavec, na.rm=TRUE))
 { windows()
   plot(lambdavec, lambdavarynegloglik)
   abline(h = critval2, col="red")
   stop("WARNING: Need to make lambdavec larger -- see R window")
 }


# Akaike weights, from Burnham and Anderson (2002), summarised in
#  Box 1 of Edwards et al. (2007). 
AICall = c(AICpowlawinf, AICexpinf, AICpowlaw, AICexp)
AICmin = min(AICall)
Delta = AICall - AICmin
like = exp( - 0.5 * Delta)
Aweights = like/sum(like)

# Evidence ratio (I'd thought not so useful when just two
#  models, but for four then worthwhile, as in Ecology paper, and
#  values don't change with number of models). 
evidenceratio = max(Aweights) / Aweights

xseq = seq(a, b, 0.01)        # Plot higher resolution
xseqinf = seq(a, 1.2*b, 0.01) # Extra range to plot unbounded

xrankfreqinf = seq(a, xrankfreqinfmaxvec[monthind], length=1000*1.1)
yrankfreqpowinf = (a / xrankfreqinf)^(mumleinf - 1) *n
                              # Doing [a,infty)

yrankfreqexpinf = exp( lambdamleinf * a) * exp( - lambdamleinf * xrankfreqinf) * n

# For bounded:
xrankfreq = seq(a, b, length=1000)
yrankfreqpow = (xrankfreq^( 1 - mumle) - b^(1 - mumle)) / (a^(1 - mumle) - b^(1 - mumle) ) * n
yrankfreqexp = ( exp( - lambdamle * xrankfreq) - exp( - lambdamle * b) ) / ( exp( - lambdamle * a) - exp( - lambdamle * b) ) * n

# Figure 1. Rank/fequency plots in two panels. First on logarithmic
#  axes, and second on linear. Same colour scheme as Ecology
#  paper - blue/red and dashed/solid

if(original.data) {fig.name = "musselsOrig"} else
   {fig.name= "musselsPseudo"}

postscript(paste(fig.name, ".eps", sep=""), horizontal=FALSE, paper="special", height = 8, width = 4+0.4)
                     # + 0.4 otherwise it cuts off 500 when printing
par(mfrow=c(2,1))
oldmai = par("mai")  #   1.02 0.82 0.82 0.42 for two figs
                     #   think may be indpt of fig size
par(mai = c(0.65 - 0.1, 0.82, 0.1 + 0.5, 0.42+0.4))
                     # so keep left and right the same, then 0.1 is taken off bottom here (as no x label) and taken off top of second figure. Adding 0.5 to top of this and bottom of second one and 1 inch to toal height so it prints out okay. + 0.4 for final one is so it doesn't cut off 100 when printing.

plot(sort(x, decreasing=TRUE), 1:n, log="xy", ylab=expression( paste("Number of ", moves >= x)), xlab="", xlim=c(0.15, 200), ylim=c(0.8, 10000), axes=FALSE, xaxs="i", yaxs="i", mgp=c(2.0,0.5,0))

# Add tick marks correctly:
ll = 1:9
log10ll = log10(ll)
axis(1, at=c(1, 10, 100, 1000, 10000), labels = c(1, 10, 100, 1000, 10000), mgp=c(1.7,0.7,0))
# axis(1, at=2, labels=2, mgp=c(1.7,0.7,0))
axis(1, at=c( ll*0.1, ll, ll*10, ll*100), labels=rep("",36), tcl=-0.2)
axis(2, at=c(1, 10, 100, 1000, 10000), labels=c(1, 10, 100, 1000, 10000), mgp=c(1.7,0.7,0))
axis(2, at=c(ll*0.1, ll, ll*10, ll*100, ll*1000, ll*10000), labels=rep("",54), tcl=-0.2)
# text(  10^( log10(100)  * figlabpos + log10(1) ), 90,  "(b)") #   - fill in these numbers. 10^( log10(120/0.8) * figlabpos + log10(0.8)) was y value = 93.4
box()

lines(xrankfreqinf, yrankfreqpowinf, col="blue")
lines(xrankfreq, yrankfreqexp, col="red", lty=5)
                    # put here to get covered up by red solid

lines(xrankfreqinf, yrankfreqexpinf, col="red")
lines(xrankfreq, yrankfreqpow, col="blue", lty=5)   

figlabpos = 0.95    # proportion of x and y axis lengths to put (a)
                    #  etc. in the corner of
# text(380, 25000, "A", font=2)     # text(figlabpos*2, 1.1, "(a)")

par(mai = c(0.65 + 0.5, 0.82, 0.1 - 0.1, 0.42+0.4))
                    # shifting up for this figure

plot(sort(x, decreasing=TRUE), 1:n, ylab=expression( paste("Number of ", moves >= x)), xlab="Movement length, x (m)", xlim=c(-5, 150), ylim=c(-100, 7200), axes=TRUE, xaxs="i", yaxs="i", mgp=c(2.0,0.5,0))

# axis(1, at=c(0, 100, 200, 300, 400, 500), labels =c(0, 100, 200, 300, 400, 500), mgp=c(1.7,0.7,0))
# axis(1, seq(0, 500, 25), labels=rep("",21), tcl=-0.2)
# axis(2, at=c(0, 10000, 20000, 30000), labels=c(0, 10000, 20000, 30000), mgp=c(1.7,0.7,0))
# axis(2, at=seq(0, 32500, 2500), labels=rep("",14), tcl=-0.2)
box()
lines(xrankfreqinf, yrankfreqpowinf, col="blue")
lines(xrankfreq, yrankfreqexp, col="red", lty=5)
                    # put here to get covered up by red
lines(xrankfreqinf, yrankfreqexpinf, col="red")
lines(xrankfreq, yrankfreqpow, col="blue", lty=5)   
text(figlabpos*500, 0.95*32500, "B", font=2)
dev.off()

# End Figure 1

# From our main text:

# The authors acknowledged that Issue one occurred, and presented a replacement of their original Fig.~1B with model fits calculated using the likelihood methods of  \cite{edwa07}. We have independently reproduced this figure and the model fits (using the corrected data set), and confirmed agreement (M. de Jager, pers. comm.) of our estimates for the power-law exponents $\mu$ for the L\'evy walk and truncated L\'evy walk models (PL and PLB models in our terminology). 

print("Reproduction of the figure is saved as musselsPseudo.eps")

print("Power-law exponents mu for the Levy walk and truncated Levy walks are, respectively,:")

catPaste(mumleinf)
catPaste(mumle)

# We agree that the truncated L\'evy walk model is indeed more supported by the data than an exponential model (overwhelmingly so, given our calculated respective Akaike weights of 1 and 0).

print("Akaike weights of 1 and 0 for PLB and Exp models. The weights for the four models we tested (PL, Exp, PLB and ExpB) are:")

print(Aweights)

# Not printing these out, but gives full details:
# The log-likelihood values for the four models are:
# loglikall = -c(negloglikmlepowlawinf, negloglikmleexpinf, negloglikmlepowlaw, negloglikmleexp)
# print(loglikall)

# The AIC values for the four models are:
# print(AICall)

# giving AIC differences $\Delta_i = AIC_i - AIC_{min}$

# print(Delta)

# and relative likelihoods e$^{-\Delta_i / 2}$

# print(like )

# giving Akaike weights

# print(Aweights)

# and evidence ratios

# print(evidenceratio)

# However, as noted in \cite{asld11}, in \cite{edwa07} we also performed goodness-of-fit tests \cite{sr95}, which test if the data are consistent with coming from the favoured model. While one model may indeed be favoured over another, it still might not be a suitable model -- see also \cite{pc11, edwa11}. 

# We therefore conduct goodness-of-fit tests on the corrected mussel data set. Our results decisively reject ($P=0$) the hypothesis that the data are consistent with coming from the truncated L\'evy walk (PLB) model shown in the Erratum \cite{jwhnk11err} (see \emph{Methods} for details). Thus, we do not agree with the Erratum's finding that the ``overall conclusion of the [original] paper that mussels adopt a L\'evy walk ... remains unchanged''.   

print("**Goodness-of-fit test**")

# From Methods:
# To test whether the corrected mussels data set from \cite{jwhnk11err} is indeed consistent with coming from the PLB model, we conducted goodness-of-fit tests using the G-test (likelihood-ratio test) with Williams's correction\cite{sr95}, as in \cite{edwa07}. Parameter $a$ was fixed at 0.2 (as in \cite{jwhnk11err}), $b$ was estimated as the maximum step length in the data set (119.1893 mm), the sample size $n = 6,996$ and the MLE for $\mu$ for the PLB model is 1.87. The two binning procedures described in Appendix A of \cite{edwa11} were used, here named Protocol 1 -- bin widths of 1 and then doubling the bin width once $<5$ data points were in a bin, and Protocol 2 -- doubling the bin widths straight away (i.e.~bins of 1, 2, 4, 8, ...; and doubling again if there were $<5$ data points in a bin). Protocol 1 resulted in 23 degrees of freedom (dof), goodness-of-fit value $G=286$, and $P=0$, thus the data are not consistent with the PLB model (if $P > 0.05$ then we would have concluded that the data are consistent with the model at the 0.05 level \cite{sr95}; this would have required that $G < \chi^2_{0.05[23]}= 35.2$, where $\chi^2_{0.05[23]}$ is the value to the right of which is found 0.05 of the area under a $\chi^2$ distribution with 23 dof\cite{sr95}). Protocol 2 resulted in the same conclusion (with 3 dof, $G =234$ and $P=0$). Given that a bin width of 1 resulted in most of the data points ending up in the first bin, we repeated the analyses with initial bin widths of 0.1 and 0.01, to see if our results were dependent on the bin widths (a bin width of 0.01 results in just 3.3\% (234/6996) of the data in the first bin). The results were (i) with the first bin width of 0.1 (Protocol 1: 96 dof, $G=383$ and $P=0$; Protocol 2: 7 dof, $G=253$ and $P=0$), and (ii) with the first bin width of 0.01 (Protocol 1: 205 dof, $G=526$ and $P=0$; Protocol 2: 10 dof, $G=253$ and $P=0$). Thus the conclusion of $P=0$ is robust to the binning procedure, and the data are definitively not consistent with the PLB model.

# The different binning methods are given below - uncomment the
#  appropriate breaksgood definition to run for the binning method.
#  Note the breaksgood values are figured out for the original,
#  not the pseudo, data.
# So uncomment one of the breaksgood =    lines:

#
# breaksgood =
# 


# musselsCorrectGood.Snw (corresponds to my original Sweave file)
# standard bin widths: 1, 1, 1, until <5 then double.

#
breaksgood = c(a, a+1:19, a+seq(21, 25, 2), a+seq(29, 33, 4), a+41, b)
#

# breaksgood is:
#  0.2   1.2   2.2   3.2   4.2   5.2   6.2
#  7.2   8.2   9.2  10.2  11.2  12.2  13.2
# 14.2  15.2 16.2   17.2  18.2  19.2  21.2  
# 23.2  25.2 29.2   33.2  41.2 119.1893

# diff(breaksgood):
#  1  1  1  1  1  1  1  1  1  1  1  1  1  1  1  1  1  1  1  2  2  2  4  4  8 77.9893


# musselsCorrectGoodbin2.Snw - doubling bin widths: 1, 2, 4,... until
#  <5 then double.

# To work it out:
# breaksgood = c(a, a + cumsum(2^(0:4)), b); hist(rawvals, breaks=breaksgood)$counts       # 2^(0:5) ends up with 11 and 4 in final bins, so
#  need to merge them.

#
# breaksgood = c(a, a + cumsum(2^(0:4)), b)
#

# breaksgood is:
#   0.2000   1.2000   3.2000   7.2000  15.2000  31.2000 119.1893

# diff(breaksgood):
#   1.00000  2.00000  4.00000  8.00000 16.00000 87.98927


# Both of those give a lot of values in the first bin, so try
#  0.1 as the first step:

# musselsCorrectGoodbin3.Snw - standard but 0.1, 0.1, 0.1, until <5
#  then double.

#
# breaksgood = c(a, a+0.1*(1:36), a+seq(3.8, 11.8, 0.2), a+seq(12.2, 15.4, 0.4), a+seq(16.2, 19.4, 0.8), a+seq(21.0, 25.8, 1.6), a+seq(29.0, 32.2, 3.2), a+45.0, b)
#

# breaksgood is, round(breaksgood, 1):
# round(breaksgood, 1)
# 0.2   0.3   0.4   0.5   0.6   0.7   0.8   0.9   1.0   1.1   1.2
# 1.3   1.4   1.5   1.6   1.7   1.8   1.9   2.0   2.1   2.2   2.3   
# 2.4   2.5   2.6   2.7   2.8   2.9   3.0   3.1   3.2   3.3   3.4   
# 3.5   3.6   3.7   3.8   4.0   4.2   4.4   4.6   4.8   5.0   5.2   
# 5.4   5.6   5.8   6.0   6.2   6.4   6.6   6.8   7.0   7.2   7.4   
# 7.6   7.8   8.0   8.2   8.4   8.6   8.8   9.0   9.2   9.4   9.6   
# 9.8  10.0  10.2  10.4  10.6  10.8  11.0  11.2  11.4  11.6  11.8
#12.0  12.4  12.8  13.2  13.6  14.0  14.4  14.8  15.2  15.6  16.4
#17.2  18.0  18.8  19.6  21.2  22.8  24.4  26.0  29.2  32.4  45.2
#119.2
 # last one is 119.1893, rest are all exact.

# diff(breaksgood):
# round(diff(breaksgood), 1)
# 0.1  0.1  0.1  0.1  0.1  0.1  0.1  0.1  0.1  0.1  0.1  0.1  0.1
# 0.1  0.1  0.1  0.1  0.1  0.1  0.1  0.1  0.1  0.1  0.1  0.1  0.1  
# 0.1  0.1  0.1  0.1  0.1  0.1  0.1  0.1  0.1  0.1  0.2  0.2  0.2
# 0.2  0.2  0.2  0.2  0.2  0.2  0.2  0.2  0.2  0.2  0.2  0.2  0.2
# 0.2  0.2  0.2  0.2  0.2  0.2  0.2  0.2  0.2  0.2  0.2  0.2  0.2
# 0.2  0.2  0.2  0.2  0.2  0.2  0.2  0.2  0.2  0.2  0.2  0.2  0.4
# 0.4  0.4  0.4  0.4  0.4  0.4  0.4  0.4  0.8  0.8  0.8  0.8  0.8
# 1.6  1.6  1.6  1.6  3.2  3.2 12.8 74.0
# last is 73.98927


# musselsCorrectGoodbin4.Snw - doubling bin widths: 0.1, 0.2, 0.4, 
#  until <5 then double.

# To work it out:
# breaksgood = c(a, a + 0.1*cumsum(2^(0:8)), b); hist(rawvals, breaks=breaksgood)$counts      
# 2^(0:9) ended up with small final bin (only 1 value in it), so
#  need 0:8.

#
# breaksgood = c(a, a + 0.1*cumsum(2^(0:8)), b)
#

# breaksgood is:
#   0.2000   0.3000   0.5000   0.9000   1.7000   3.3000   6.5000
#  12.9000  25.7000  51.3000 119.1893

# diff(breaksgood):
# 0.10000  0.20000  0.40000  0.80000  1.60000  3.20000  
#  6.40000 12.80000 25.60000 67.88927


# Now trying first bin as width of 0.01 (though that's 0.01 mm, so
#  perhaps inappropriately small given what the data are).

# musselsCorrectGoodBin5.Snw - standard with 0.01, 0.01, 0.01 until
# <5 then double. 

#
# breaksgood = c(a, a+0.01*(1:92), a+seq(0.94, 1.48, 0.02), a+seq(1.52, 2.08, 0.04), a+seq(2.16, 3.60, 0.08), a+seq(3.76, 6.00, 0.16), a+seq(6.32, 14.00, 0.32), a+seq(14.64, 15.92, 0.64), a+seq(17.20, 24.88, 1.28), a+seq(30.00, 35.12, 5.12), a+45.36, b)
#

#breaksgood is, round(breaksgood, 1):
# round(breaksgood, 2)
# 0.20   0.21   0.22   0.23   0.24   0.25   0.26   0.27   0.28   0.29
# 0.30   0.31   0.32   0.33   0.34   0.35   0.36   0.37   0.38   0.39
# 0.40   0.41   0.42   0.43   0.44   0.45   0.46   0.47   0.48   0.49
# 0.50   0.51   0.52   0.53   0.54   0.55   0.56   0.57   0.58   0.59
# 0.60   0.61   0.62   0.63   0.64   0.65   0.66   0.67   0.68   0.69
# 0.70   0.71   0.72   0.73   0.74   0.75   0.76   0.77   0.78   0.79
# 0.80   0.81   0.82   0.83   0.84   0.85   0.86   0.87   0.88   0.89
# 0.90   0.91   0.92   0.93   0.94   0.95   0.96   0.97   0.98   0.99
# 1.00   1.01   1.02   1.03   1.04   1.05   1.06   1.07   1.08   1.09
# 1.10   1.11   1.12   1.14   1.16   1.18   1.20   1.22   1.24   1.26
# 1.28   1.30   1.32   1.34   1.36   1.38   1.40   1.42   1.44   1.46
# 1.48   1.50   1.52   1.54   1.56   1.58   1.60   1.62   1.64   1.66
# 1.68   1.72   1.76   1.80   1.84   1.88   1.92   1.96   2.00   2.04
# 2.08   2.12   2.16   2.20   2.24   2.28   2.36   2.44   2.52   2.60
# 2.68   2.76   2.84   2.92   3.00   3.08   3.16   3.24   3.32   3.40
# 3.48   3.56   3.64   3.72   3.80   3.96   4.12   4.28   4.44   4.60
# 4.76   4.92   5.08   5.24   5.40   5.56   5.72   5.88   6.04   6.20
# 6.52   6.84   7.16   7.48   7.80   8.12   8.44   8.76   9.08   9.40
# 9.72  10.04  10.36  10.68  11.00  11.32  11.64  11.96  12.28  12.60
#12.92  13.24  13.56  13.88  14.20  14.84  15.48  16.12  17.40  18.68
#19.96  21.24  22.52  23.80  25.08  30.20  35.32  45.56 119.19

# last one is 119.1893, rest are all exact.

# round(diff(breaksgood), 2)
# 0.01  0.01  0.01  0.01  0.01  0.01  0.01  0.01  0.01  0.01  0.01  0.01
# 0.01  0.01  0.01  0.01  0.01  0.01  0.01  0.01  0.01  0.01  0.01  0.01
# 0.01  0.01  0.01  0.01  0.01  0.01  0.01  0.01  0.01  0.01  0.01  0.01
# 0.01  0.01  0.01  0.01  0.01  0.01  0.01  0.01  0.01  0.01  0.01  0.01
# 0.01  0.01  0.01  0.01  0.01  0.01  0.01  0.01  0.01  0.01  0.01  0.01
# 0.01  0.01  0.01  0.01  0.01  0.01  0.01  0.01  0.01  0.01  0.01  0.01
# 0.01  0.01  0.01  0.01  0.01  0.01  0.01  0.01  0.01  0.01  0.01  0.01
# 0.01  0.01  0.01  0.01  0.01  0.01  0.01  0.01  0.02  0.02  0.02  0.02
# 0.02  0.02  0.02  0.02  0.02  0.02  0.02  0.02  0.02  0.02  0.02  0.02
# 0.02  0.02  0.02  0.02  0.02  0.02  0.02  0.02  0.02  0.02  0.02  0.02
# 0.04  0.04  0.04  0.04  0.04  0.04  0.04  0.04  0.04  0.04  0.04  0.04
# 0.04  0.04  0.04  0.08  0.08  0.08  0.08  0.08  0.08  0.08  0.08  0.08
# 0.08  0.08  0.08  0.08  0.08  0.08  0.08  0.08  0.08  0.08  0.16  0.16
# 0.16  0.16  0.16  0.16  0.16  0.16  0.16  0.16  0.16  0.16  0.16  0.16
# 0.16  0.32  0.32  0.32  0.32  0.32  0.32  0.32  0.32  0.32  0.32  0.32
# 0.32  0.32  0.32  0.32  0.32  0.32  0.32  0.32  0.32  0.32  0.32  0.32
# 0.32  0.32  0.64  0.64  0.64  1.28  1.28  1.28  1.28  1.28  1.28  1.28
# 5.12  5.12 10.24 73.63

# last is 73.62927


# musselsCorrectGoodBin6.Snw - doubling bin width 0.01, 0.02, 0.04,
#  <5 then double again.

# To work it out:
# breaksgood = c(a, a + 0.01*cumsum(2^(0:11)), b); hist(rawvals, breaks=breaksgood)$counts      

#
# breaksgood = c(a, a + 0.01*cumsum(2^(0:11)), b)
#

# breaksgood is:
# 0.2000   0.2100   0.2300   0.2700   0.3500   0.5100   0.8300
# 1.4700   2.7500   5.3100  10.4300  20.6700  41.1500 119.1893

# diff(breaksgood)
# 0.01000  0.02000  0.04000  0.08000  0.16000  0.32000  0.64000
# 1.28000  2.56000  5.12000 10.24000 20.48000 78.03927

hgoodness = hist(x, breaks=breaksgood) 

observed = hgoodness$counts        # observations in each bin
if(sum(observed) != n) { stop("Something wrong with hgoodness")}

numbins = length(breaksgood) - 1   # number of bins

source("codeCgoodness.r")  # Should really make this a function,
                           #  and not have variables like observed
                           #  overwritten for different bin width
                           #  specification (I usually have a
                           #  separate file for goodness-of-fit
                           #  calculations and do it all in Sweave).

if(original.data) {save.image(file = "musselsOrig.RData")} else
   {save.image(file = "musselsPseudo.RData")}
