# Supplementary material for: Incorrect Likelihood Methods Were Used to Infer Scaling Laws of Marine Predator Search Behaviour
Source: PLoS One. 2012 Oct 5;7(10):e45174. doi: 10.1371/journal.pone.0045174 (PMC3465316; doi:10.1371/journal.pone.0045174)
Supplement: Code S5 — R code to calculate summary statistics for range calculations related to [33] . (R) [file pone.0045174.s005.r]

# codeErange.r - range calculations from the Humphries (2010)
#  Supplementary Table S3. 17th July 2012
# Andrew Edwards. Andrew.Edwards@dfo-mpo.gc.ca

# From my rangeQuestion.r -  26th April 2012.

# The text from our manuscript is (this code will calculate the quoted results):
# Ref.~\cite{hump10} did not use the aforementioned methods of \cite{sims08}. Their methods were based on those developed and tested more recently in \cite{csn09}. Ref.~\cite{csn09} developed a method to estimate, for the PL model (\ref{PLeqn}), the most suitable value of $a$ to be considered as the start of the tail. However, \cite{hump10} used this approach to also estimate $b$ (their $x_{\text{max}}$) for the PLB model (\ref{PLBeqn}), the maximum value of the data to be fitted to by the model. This was often less than the maximum value of the data set. To see this, compare the `Max step length (m)' column with the `Best fit Xmax' column in Table S3 of \cite{hump10}. The first example is for bigeye tuna 1 (section 2), for which the maximum step length in the data was 1,531~m but the best fit $x_{\text{max}}$ was only 466~m. Thus, for this example (which happens to be the most extreme), step lengths $>466$~m were not part of the final model fits, even though values up to 1,531~m were recorded. Of the 94 data sets (sections) analysed statistically, 66 were best fitted by the PLB model (compared to other models). Of these 66, 28 (42\%) have `Best fit Xmax' less than the `Max step length' of the data. The 28 cases have a mean ratio of `Best fit Xmax' to `Max step length' of 0.75, with five-number summary (minimum, quartiles and maximum) of 0.30, 0.59, 0.80, 0.91, 0.99. 

# So the Humphries et al. (2010) Table S3 has 94 data sets
#  (sections). Of these, 66 have the TP (truncated power-law)
#  given as the best fit distribution. Of these 66, 28 (42%) have
#  'Best fit xmax' < max step length of the data.

rm(list=ls())    

# First need the 'Max step length (m)' values and corresponding
#  'Best fit xmax' values for the 28 cases that have TP and
#  'Max step length' > 'Best fit xmax'. Typing in from the two
#  appropriate columns in Table S3.

maxData = c(1531, 336, 1635, 1526, 648, 735, 324, 350, 414, 414, 327,
  293, 334, 204,    177.522, 107.589, 156.004, 172.143, 209.799,
  172.143, 473,   177,   482, 166.7, 166,    160.5, 161, 80)

maxFit  = c(466,  297, 1601,  677, 262, 395, 286, 333, 267, 397, 291,
  231, 266,  91.45, 145,      80.7,   123.7,    86.1,   166.8,
  150,     435.7, 161.3, 167, 156,   129.11, 159,   146, 59.2)

ratio = maxFit/maxData

results = cbind(maxData, maxFit, ratio)

sortRatio = sort(ratio)      # Sort into ascending order

plot(sortRatio)

print(results)

print(round(sortRatio, 2))

# print(summary(ratio))

print("The 28 cases have a mean ratio of `Best fit Xmax' to `Max step length' of 0.75,...")

print(mean(ratio))

print("...with five-number summary (minimum, quartiles and maximum) of 0.30, 0.59, 0.80, 0.91, 0.99.")

print(round(fivenum(ratio), 2))
      
